# Supplementary material for: Workplace Leadership Development Practices: An Environmental Scan
Source: MDPI journal article supplement (doi:10.3390/merits4010003), 2024-02-06
Supplement: s1 [file s1]

**Supplementary Material Table S1 Academic Leadership Development Surveys**

| Date | Authors                                 | Title                                                                                      | Sample                                                                                                                                                                                                                   | Theory / Summary                                                                                                                                                                                                                                                                                                           | Published                                                                                                                                                            |
|------|-----------------------------------------|--------------------------------------------------------------------------------------------|--------------------------------------------------------------------------------------------------------------------------------------------------------------------------------------------------------------------------|----------------------------------------------------------------------------------------------------------------------------------------------------------------------------------------------------------------------------------------------------------------------------------------------------------------------------|----------------------------------------------------------------------------------------------------------------------------------------------------------------------|
| 2022 | Birkinshaw, J. & Gudka, M.              | Leadership development through experimentation: a theoretical framework and empirical test | Two different samples of leaders, with results presented separately. Sample 1: 481 alumni from the executive programs of a leading business school. Sample 2 was 310 executives from a large financial services company. | The authors test four hypotheses on two groups of leaders finding evidence that two forms of experimentation provide significant explanatory power in understanding why some individuals engage in higher levels of action-taking than others. Also, confirms the central role of action-taking in leadership development. | The Journal of Management Development 2022 Vol. 41 Issue 2 Pages 70-93<br>DOI: 10.1108/JMD-10-2021-0289                                                              |
| 2020 | Zia, M.Q., Naveed, M. and Bashir, M.A.  | The interaction of situational factors on individual factors and self-development          | Survey<br>280 middle managers of the Pakistan banking sector                                                                                                                                                             | To investigate the influence of individual and situational factors on self-development as well as the moderating role of situational factors.                                                                                                                                                                              | European Journal of Training and Development, 44(4-5), 509–530.<br><a href="https://doi.org/10.1108/EJTD-10-2019-0172">https://doi.org/10.1108/EJTD-10-2019-0172</a> |
| 2020 | Barratt-Pugh, L., Hodge, S. & Smith, E. | Learning and development practitioners: identity, profession, and future trajectory        | Mixed Methods Approach<br>Nearly 800 Australian L&D practitioners                                                                                                                                                        | Explores how L&D practice has changed; if a professional identity for L&D practitioners is emerging; and what development needs L&D practitioners have.                                                                                                                                                                    | Asia Pacific Journal of Human Resources. Volume58, Issue2                                                                                                            |
| 2019 | Boak, G. & Crabbe, S.                   | Experiences that develop leadership capabilities                                           | Survey<br>115 Mature manager and professionals                                                                                                                                                                           | To answer the research question: what recent experiences – other than undertaking training and development programmes – do mature managers and professionals regard as important for their development as leaders?                                                                                                         | Leadership & Organization Development Journal 2019 Vol. 40 Issue 1 Pages 97-106<br>DOI: 10.1108/LODJ-07-2018-0254                                                    |
| 2018 | Holt, S., Hall, A. & Gilley, A.         | Essential Components of Leadership Development Programs                                    | Survey<br>273 employees in the sales division of a large pharmaceutical company (USA)                                                                                                                                    | Respondents identified the skills and behaviours associated with successful leaders and those needing continuous development.                                                                                                                                                                                              | Journal of Managerial Issues: JMI; Pittsburgh (Summer 2018): 214-229.                                                                                                |

| Date | Authors                                                                                  | Title                                                                                                                  | Sample                                                                                                                                                                                             | Theory / Summary                                                                                                                                                                                                                                                      | Published                                                                                                                                                             |
|------|------------------------------------------------------------------------------------------|------------------------------------------------------------------------------------------------------------------------|----------------------------------------------------------------------------------------------------------------------------------------------------------------------------------------------------|-----------------------------------------------------------------------------------------------------------------------------------------------------------------------------------------------------------------------------------------------------------------------|-----------------------------------------------------------------------------------------------------------------------------------------------------------------------|
| 2018 | Johnson, S.J., Blackman, D.A., & Buick, F. (2018)                                        | The 70:20:10 framework and the transfer of learning.                                                                   | Australian Public Service<br>Phase1 Semi Structured Interviews 5 Senior Managers<br>Phase 2 Semi structured interviews x 2, Middle Managers Phase 3 Semi Structured interviews 122 Middle Managers | The effectiveness of the 702010 Framework is assessed in relation to the transfer of learning. This study explores how the framework is being implemented and whether it facilitates the transfer of learning to build middle management capability.                  | Human Resource Development Quarterly, 29, 383–402.<br>doi:10.1002/hrdq.21330                                                                                          |
| 2018 | Eames, S., Bennett, S., Whitehead, M., Fleming, J., Low, S.O., Mickan, S. & Caldwell, E. | A pre-post evaluation of a knowledge translation capacity-building intervention                                        | A pre-post survey 46 occupational therapy clinicians in a large metropolitan hospital (Aus).                                                                                                       | Investigates methods to build clinicians' capacity for Knowledge Transfer, KT. To: (i) evaluate the impact of a multifaceted KT capacity-building intervention; (ii) understand barriers and enablers to clinicians' use of KT; and (iii) identify useful strategies. | Australian Occupational Therapy Journal Volume 65, Issue 6, 479 - 493                                                                                                 |
| 2018 | El Baroudi, S., Abdulaal, Y.D. & Rampur, M.                                              | Training effectiveness during technological changes in Dubai-based companies: perspectives from managers and employees | Semi-structured interviews 8 managers, 7 employees from 4 Dubai-based companies.                                                                                                                   | Examines the effectiveness of training during technological changes in four companies located in Dubai.                                                                                                                                                               | Development and Learning in Organizations 2018 Vol. 32 Issue 3 Page 1-3<br>DOI: 10.1108/DLO-10-2017-0085                                                              |
| 2017 | Cullen-Lester, K.L., Maupin, C.K., and Carter, D.R.                                      | Incorporating social networks into leadership development: A conceptual model and evaluation of research and practice  | Survey 282 practitioners USA                                                                                                                                                                       | Presents a conceptual model explaining how three distinct approaches for network-enhancing leadership development can improve the leadership capacity of individuals and collectives.                                                                                 | The Leadership Quarterly Volume 28, Issue 1, February 2017<br><a href="https://doi.org/10.1016/j.leaqua.2016.10.005">https://doi.org/10.1016/j.leaqua.2016.10.005</a> |
| 2017 | Sørensen, P.                                                                             | What research on learning transfer can teach about improving                                                           | Managers in the Danish public sector                                                                                                                                                               | A report on an initial study of how managers in the Danish public sector perceive their organizations in terms of 9 key transfer conditions identified in the review.                                                                                                 | Consulting Psychology Journal: Practice and Research, 69(1), 47–62. <a href="https://doi.org/10.1037/cpb0000072">https://doi.org/10.1037/cpb0000072</a>               |

| Date | Authors                                                                            | Title                                                                                       | Sample                                                                                                                    | Theory / Summary                                                                                                                                                                                                                                 | Published                                                                                                                                                           |
|------|------------------------------------------------------------------------------------|---------------------------------------------------------------------------------------------|---------------------------------------------------------------------------------------------------------------------------|--------------------------------------------------------------------------------------------------------------------------------------------------------------------------------------------------------------------------------------------------|---------------------------------------------------------------------------------------------------------------------------------------------------------------------|
|      |                                                                                    | the impact of leadership-development initiatives                                            |                                                                                                                           |                                                                                                                                                                                                                                                  |                                                                                                                                                                     |
| 2016 | Brown, T.C., Warren, A.M., & Khattar, V.                                           | The Effects of Different Behavioral Goals on Transfer from a Management Development Program | Quasi-experimental Design<br>172 public sector employees enrolled in a managerial development program.                    | Examined transfer from a training program that focused on interpersonal skills.                                                                                                                                                                  | Human Resource Development Quarterly 2016 Vol. 27 Issue 3 Pages 349-372<br>DOI: <a href="https://doi.org/10.1002/hrdq.21257">https://doi.org/10.1002/hrdq.21257</a> |
| 2014 | Troth, A.C., Gyetvey, C.                                                           | Identifying leadership potential in an Australian context                                   | 166 Australian public service employees, and their 149 managers, are considered as well as the presence of rater effects. | Empirically examines the role of general mental ability, problem-solving skill, emotional intelligence, employee engagement and career aspiration in identifying leadership potential.                                                           | Asia Pacific Journal of Human Resources Volume 52, Issue 3<br>doi:10.1111/1744-7941.12034                                                                           |
| 2014 | Ren, S., Collins, N. & Zhu, Y.                                                     | Leadership self-development in China and Vietnam                                            |                                                                                                                           | This paper focuses on the self-initiated approach to professional development that has been introduced by managers at a grassroots level to improve business leadership (referred to as self-development).                                       | Asia Pacific Journal of Human Resources Volume 52, Issue 1 January 2014                                                                                             |
| 2013 | Cummings, G.G., Spiers, J.A., Sharlow, J., Germann, P., Yurtseven, O. & Bhatti, A. | Worklife Improvement and Leadership Development study                                       | Survey and interviews. 5 cohorts of health care managers and staff at the Alberta Cancer Board.                           | To assess the effects of LDI on worklife of leaders and staff.                                                                                                                                                                                   | Health Care Management Review Vol. 38, No. 1 (January-March 2013),<br><a href="https://www.jstor.org/stable/48516147">https://www.jstor.org/stable/48516147</a>     |
| 2012 | Choi, M., Yoon, H.J. & Jeung, C.                                                   | Leadership development in Korea: a Delphi study                                             | The Delphi method was used to obtain the consensus of a group of leadership development experts in Korea                  | The purpose of this study was to identify the leadership competencies most required for leaders operating in Korean organizations and to examine the characteristics of leadership development practices used for developing those competencies. | Asia Pacific Journal of Human Resources Volume 50, Issue 1.                                                                                                         |

| Date | Authors                               | Title                                                              | Sample                                                                                         | Theory / Summary                                                                                                                                                                     | Published                                                                                                                                                  |
|------|---------------------------------------|--------------------------------------------------------------------|------------------------------------------------------------------------------------------------|--------------------------------------------------------------------------------------------------------------------------------------------------------------------------------------|------------------------------------------------------------------------------------------------------------------------------------------------------------|
| 2011 | Crethar, M., Phillips, J. & Brown, P. | Queensland Health – a leadership development journey: A case study | Survey Queensland Health (Queensland Department of Health, Australia) over 10,000 participants | Seeks to outline how leadership development is being utilised across to achieve improvements in workplace culture and ultimately improvements in clinical care and patient outcomes. | Leadership in Health Services, Vol. 24 No. 4, pp. 308-324. <a href="https://doi.org/10.1108/1751187111172358">https://doi.org/10.1108/1751187111172358</a> |

### References for Table S1

1. Birkinshaw, J., Gudka, M. Leadership development through experimentation: a theoretical framework and empirical test. *The Journal of Management Development* **2022** 41, 70-93. DOI: <https://doi.org/10.1108/JMD-10-2021-0289>.
2. Zia, M.Q., Naveed, M., Bashir, M.A. The interaction of situational factors on individual factors and self-development. *European Journal of Training and Development*, **2020** 44, 509–530. DOI: <https://doi.org/10.1108/EJTD-10-2019-0172>.
3. Barratt-Pugh, L., Hodge, S., Smith, E. Learning and development practitioners: identity, profession, and future trajectory. *Asia Pacific Journal of Human Resources* **2020** 58, 220-246. DOI: <https://doi.org/10.1111/1744-7941.12207>.
4. Boak, G. & Crabbe, S. Experiences that develop leadership capabilities. *Leadership & Organization Development Journal* **2019** 40, 97-106. DOI: <https://doi.org/10.1108/LODJ-07-2018-0254>.
5. Holt, S., Hall, A., Gilley, A. Essential components of leadership development programs. *Journal of Managerial Issues* **2018** 30, 214-229.
6. Johnson, S.J., Blackman, D.A., Buick, F. The 70:20:10 framework and the transfer of learning. *Human Resource Development Quarterly* **2018** 29, 383-402. DOI: <https://doi.org/10.1002/hrdq.21330>.
7. Eames, S., Bennett, S., Whitehead, M., Fleming, J., Low, S.O., Mickan, S., Caldwell, E. A pre-post evaluation of a knowledge translation capacity-building intervention. *Australian Occupational Therapy Journal* **2018** 65, 479-493.
8. El Baroudi, S., Abdulaal, Y. D., Rampur, M. Training effectiveness during technological changes in Dubai-based companies: perspectives from managers and employees. *Development and Learning in Organizations* **2018** 32, 1-3.
9. Cullen-Lester, K.L., Maupin, C.K., Carter, D.R. Incorporating social networks into leadership development: A conceptual model and evaluation of research and practice. *The Leadership Quarterly* **2017** 28, 130-152. DOI: <https://doi.org/10.1016/j.leaqua.2016.10.005>.
10. Brown, T.C., Warren, A.M., Khattar, V. The Effects of Different Behavioral Goals on Transfer from a Management Development Program. *Human Resource Development Quarterly* **2016** 27, 349-372. DOI: <https://doi.org/10.1002/hrdq.21257>.
11. Troth, A.C., Gyetvey, C. Identifying leadership potential in an Australian context. *Asia Pacific Journal of Human Resources* **2014** 52, 333-350. DOI: 10.1111/1744-7941.12034.
12. Ren, S., Collins, N., Zhu, Y. Leadership self-development in China and Vietnam. *Asia Pacific Journal of Human Resources* **2014** 52, 42-59. DOI: <https://doi.org/10.1111/1744-7941.12022>.
13. Cummings, G.G., Spiers, J.A., Sharlow, J., Germann, P., Yurtseven, O., Bhatti, A. Worklife improvement and leadership development study. *Health Care Management Review* **2013** 38, 1-13.

14. Choi, M., Yoon, H.J., Jeung, C. Leadership development in Korea: a Delphi study. *Asia Pacific Journal of Human Resources* **2012** 50, 23-42. DOI: <https://doi.org/10.1111/j.1744-7941.2011.00001.x>.
15. Crethar, M., Phillips, J., Brown, P. Queensland Health – a leadership development journey: a case study. *Leadership in Health Services* **2011** 24, 308-324. DOI: <https://doi.org/10.1108/17511871111172358>.

**Supplementary material Table S2. Grey Literature Leadership Development Surveys**

| Date | Authors                                              | Title                                                   | Sample                                                                            | Theory / Summary                                                                                                                                                                                                                                                                             | Published                                                                                                                                                                                                                                                                                                                                 |
|------|------------------------------------------------------|---------------------------------------------------------|-----------------------------------------------------------------------------------|----------------------------------------------------------------------------------------------------------------------------------------------------------------------------------------------------------------------------------------------------------------------------------------------|-------------------------------------------------------------------------------------------------------------------------------------------------------------------------------------------------------------------------------------------------------------------------------------------------------------------------------------------|
| 2023 | N/A                                                  | Linked In Workplace Learning Report 2023                | Survey 1,579 L&D and HR professionals and 722 learners.                           | How for individuals, agility fuels career growth and relevance. For organizations, agility equals the ability to survive and thrive in difficult economic times.                                                                                                                             | Linked In Learning<br><a href="https://learning.linkedin.com/content/dam/me/learning/en-us/pdfs/workplace-learning-report/LinkedIn-Learning_Workplace-Learning-Report-2023-EN.pdf">https://learning.linkedin.com/content/dam/me/learning/en-us/pdfs/workplace-learning-report/LinkedIn-Learning_Workplace-Learning-Report-2023-EN.pdf</a> |
| 2022 | Ferrer, J., Treuren, G., Holland, P. and Bartram, T. | The State of the Human Resource Profession in Australia | Survey AHRI database 391 HR professionals                                         | This research examines the state of the HR profession to understand how HR operates and emerging issues for professional practice                                                                                                                                                            | Australian Human Resource Institute, AHRI<br><a href="https://www.ahri.com.au/wp-content/uploads/State-of-HR-2022-Report.pdf">https://www.ahri.com.au/wp-content/uploads/State-of-HR-2022-Report.pdf</a>                                                                                                                                  |
| 2021 | Crowley, E. and Overton, L                           | Learning and skills at work survey 2021                 | Survey YouGov panel and CIPD's network 1,219 L&D professionals                    | CIPD in partnership with Accenture, explores the trends and practices in learning and skills development within organisations. Its goal is to provide learning professionals and senior leaders with evidence-led recommendations to transform the learning provision within their contexts. | Chartered Institute of Personnel and Development, CIPD, London<br><a href="https://www.cipd.org/globalassets/media/comms/news/as2learning-skills-work-report-2021-1_tcm18-95433.pdf">https://www.cipd.org/globalassets/media/comms/news/as2learning-skills-work-report-2021-1_tcm18-95433.pdf</a>                                         |
| 2021 | A joint AHRI and The Leaders Lab study.              | The State of Leadership in Australian Workplaces        | Survey 1,007 randomly selected workers representative of the Australian workforce | Based on the PERMAH Wellbeing Survey ( <a href="http://www.permahsurvey.com">www.permahsurvey.com</a> ) to identify the factors that support and undermine wellbeing and performance for leaders and their teams.                                                                            | Australian Human Resource Institute, AHRI<br><a href="https://www.ahri.com.au/wp-content/uploads/MMcQ_LeadersLab_WorkplaceReport2021.pdf">https://www.ahri.com.au/wp-content/uploads/MMcQ_LeadersLab_WorkplaceReport2021.pdf</a>                                                                                                          |
| 2020 | McLeod, H., Innarelli, J., Zhu, S and Sword, C.      | Comparing Lenses: Business Schools and                  | Survey 273 AACSB members from 52 countries                                        | SHRM and AACSB International partnered on a study to better understand how business                                                                                                                                                                                                          | <a href="http://aacsb.edu">aacsb.edu</a> / <a href="http://shrm.org">shrm.org</a> .<br><a href="https://www.shrm.org/hr-today/trends-and-forecasting/research-and-">https://www.shrm.org/hr-today/trends-and-forecasting/research-and-</a>                                                                                                |

| Date | Authors                                                                                   | Title                                                                                                            | Sample                                                                      | Theory / Summary                                                                                                                                                                                            | Published                                                                                                                                                                                                                                                   |
|------|-------------------------------------------------------------------------------------------|------------------------------------------------------------------------------------------------------------------|-----------------------------------------------------------------------------|-------------------------------------------------------------------------------------------------------------------------------------------------------------------------------------------------------------|-------------------------------------------------------------------------------------------------------------------------------------------------------------------------------------------------------------------------------------------------------------|
|      |                                                                                           | Employers on Leadership Development Report                                                                       | 241 SHRM members                                                            | schools and employers are approaching leadership development.                                                                                                                                               | surveys/Documents/SHRM%20AACSB%20Leadership%20Development%20Report.pdf                                                                                                                                                                                      |
| 2019 | N/A                                                                                       | 5 Hard Truths About Workplace Culture: A reality check and a pathway towards sustainable business                | Survey<br>967 CEOs, department secretaries, executives and other employees. | The factors that both prevent and help leaders to achieve an ethical culture                                                                                                                                | Australian Human Resource Institute, AHRI and Insync<br><a href="https://www.ahri.com.au/wp-content/uploads/ahri_workplaceculture_web.pdf">https://www.ahri.com.au/wp-content/uploads/ahri_workplaceculture_web.pdf</a>                                     |
| 2017 | Nisgaard, J. & Jennings, C.                                                               | Experiences that develop                                                                                         | Case Study / Survey<br>161 leaders and managers European energy company     | Provides an insight into the way leaders and managers learn and develop in a leading-edge, global company.                                                                                                  | 702010 Institute<br><a href="https://702010institute.com/wp-content/uploads/2018/11/Experiences-that-develop.pdf">https://702010institute.com/wp-content/uploads/2018/11/Experiences-that-develop.pdf</a>                                                   |
| 2016 | N/A                                                                                       | Leadership The Path to Greater Effectiveness<br>Society for Human Resource Management                            | Survey<br>422 HR professionals U.S. and Europe.                             | This report explores valuable practices in leadership development that can serve as a foundation for organizations as they foster their top talent to build stronger, forward-thinking 21st century leaders | EFMD, NOCA SHRM<br><a href="https://efmdglobal.org/wp-content/uploads/Leadership-Development-The-Path-to-Greater-Effectiveness.pdf">https://efmdglobal.org/wp-content/uploads/Leadership-Development-The-Path-to-Greater-Effectiveness.pdf</a>              |
| 2016 | Dopson, S., Ferlie, E., McGivern, G., Fischer, M., Ledger, J., Behrens, S. and Wilson, S. | The Impact of Leadership and Leadership Development in Higher Education: A Review Of The Literature and Evidence | Literature Review                                                           | To identify examples of leadership interventions in higher education found to be effective and relevant developments in leadership theory.                                                                  | Leadership Foundation for Higher Education<br><a href="https://kclpure.kcl.ac.uk/ws/portalfiles/portal/51614584/6616_LFHE_R_D_Dopson_104pp_19.4.16.pdf">https://kclpure.kcl.ac.uk/ws/portalfiles/portal/51614584/6616_LFHE_R_D_Dopson_104pp_19.4.16.pdf</a> |
| 2016 | N/A                                                                                       | 2016 Survey on Leadership Development                                                                            | Survey<br>Approx.1,000 senior executives across a range of industries.      | Insights of into Leadership Development. Offers six recommendations to establish robust leadership development programs                                                                                     | Borderless<br><a href="https://www.borderless.net/wordpress/wp-content/uploads/2016/03/Survey-Results-Leadership-Development-2016.pdf">https://www.borderless.net/wordpress/wp-content/uploads/2016/03/Survey-Results-Leadership-Development-2016.pdf</a>   |
| 2015 | Loew, L.                                                                                  | Leadership Development 2015: The Time to Act is Now                                                              | Survey and interviews more than 500 organisations                           | Summary of Brandon Hall Group's 2015 State of Leadership Development Study                                                                                                                                  | Training Magazine<br><a href="https://trainingmag.com/improving-leadership-development-the-time-to-act-is-now/">https://trainingmag.com/improving-leadership-development-the-time-to-act-is-now/</a>                                                        |

| Date | Authors                   | Title                                                         | Sample                                                                                    | Theory / Summary                                                                                                                                                                                                                                                                                                                                                                                                         | Published                                                                                                                                                                                                                                                                                                                 |
|------|---------------------------|---------------------------------------------------------------|-------------------------------------------------------------------------------------------|--------------------------------------------------------------------------------------------------------------------------------------------------------------------------------------------------------------------------------------------------------------------------------------------------------------------------------------------------------------------------------------------------------------------------|---------------------------------------------------------------------------------------------------------------------------------------------------------------------------------------------------------------------------------------------------------------------------------------------------------------------------|
| 2015 | Wentworth, D.             | The 702010 Framework: formalising the informal                | Survey not specified                                                                      | Analysis of Brandon Hall Group research to examine best practices of organizations that have adopted the 702010 model.                                                                                                                                                                                                                                                                                                   | Training Magazine.com<br><a href="https://trainingmag.com/the-702010-learning-framework-formalizing-the-informal/">https://trainingmag.com/the-702010-learning-framework-formalizing-the-informal/</a><br><a href="https://www.brandonhall.com/practice_area_le.php">https://www.brandonhall.com/practice_area_le.php</a> |
| 2013 | Begley, P.                | AHRI Pulse Survey Learning and Development                    | Survey<br>561 AHRI database                                                               | Findings in this research report indicate some progressive thinking has taken place in learning and development since AHRI published a similar report in 2010                                                                                                                                                                                                                                                            | Australian Human Resources Institute, AHRI<br><a href="https://www.ahri.com.au/wp-content/uploads/pulse_development-report.pdf">https://www.ahri.com.au/wp-content/uploads/pulse_development-report.pdf</a>                                                                                                               |
| 2013 | Kajewski, K. & Madsen, V. | Demystifying 70:20:10. White Paper                            | Interviews with 24 organisations in Australia and internationally                         | The organisations used a range of methods from informal conversations through to formal procedures to apply and embed the 70:20:10 model. There were also varying levels of alignment with performance and talent management processes, learning and development and business strategy. Support and integration of the 70:20:10 model within the organisations ranged from simply rhetoric to mandating its application. | DeakinCo<br><a href="https://deakinco.emdev.au/wp-content/uploads/2021/07/dc_70-20-10wp_v02_FA.pdf">https://deakinco.emdev.au/wp-content/uploads/2021/07/dc_70-20-10wp_v02_FA.pdf</a>                                                                                                                                     |
| 2013 | Loew, I. & Wentworth, D.  | Leadership: the state of leadership development programs 2013 | Survey<br>329 organizations of all sizes in more than 20 industries from around the globe | Development Benchmarking Survey including:<br>· Effectiveness and measurements of LD practices<br>· Allocation of resources for LD<br>· Relationship between effectiveness of LD programs and time<br>· LD accountability<br>· Identification of potential leaders                                                                                                                                                       | Brandon Hall Group<br><a href="https://www.brandonhall.com/practice_area_le.php">https://www.brandonhall.com/practice_area_le.php</a>                                                                                                                                                                                     |

### References for Table S2

1. LinkedIn Learning. Available online at: [https://learning.linkedin.com/content/dam/me/learning/en-us/pdfs/workplace-learning-report/LinkedIn-Learning\\_Workplace-Learning-Report-2023-EN.pdf](https://learning.linkedin.com/content/dam/me/learning/en-us/pdfs/workplace-learning-report/LinkedIn-Learning_Workplace-Learning-Report-2023-EN.pdf). Accessed 5 October 2023.
2. AHRI. Available online at: <https://www.ahri.com.au/wp-content/uploads/State-of-HR-2022-Report.pdf>. Access 20 October 2022.

3. CIPD.org. Available online at: [https://www.cipd.org/globalassets/media/comms/news/as2learning-skills-work-report-2021-1\\_tcm18-95433.pdf](https://www.cipd.org/globalassets/media/comms/news/as2learning-skills-work-report-2021-1_tcm18-95433.pdf). Accessed 10 May 2022.
4. AHRI. Available online at: [https://www.ahri.com.au/wp-content/uploads/MMcQ\\_LeadersLab\\_WorkplaceReport2021.pdf](https://www.ahri.com.au/wp-content/uploads/MMcQ_LeadersLab_WorkplaceReport2021.pdf). Accessed 10 October 2022.
5. AACSB.edu / SHRM.org. Available online at: <https://www.shrm.org/hr-today/trends-and-forecasting/research-and-surveys/Documents/SHRM%20AACSB%20Leadership%20Development%20Report.pdf>. Accessed 22 October 2022.
6. AHRI. Available online at: [https://www.ahri.com.au/wp-content/uploads/ahri\\_workplaceculture\\_web.pdf](https://www.ahri.com.au/wp-content/uploads/ahri_workplaceculture_web.pdf). Accessed 22 October 2022.
7. 702010 Institute. Available online at: <https://702010institute.com/wp-content/uploads/2018/11/Experiences-that-develop.pdf>. Accessed 5 May 2021.
8. EFMD.org. Available at: <https://efmdglobal.org/wp-content/uploads/Leadership-Development-The-Path-to-Greater-Effectiveness.pdf>. Accessed 5 May 2021.
9. Leadership Foundation for Higher Education. Available at: [https://kclpure.kcl.ac.uk/ws/portalfiles/portal/51614584/6616\\_LFHE\\_R\\_D\\_Dopson\\_104pp\\_19.4.16.pdf](https://kclpure.kcl.ac.uk/ws/portalfiles/portal/51614584/6616_LFHE_R_D_Dopson_104pp_19.4.16.pdf). Accessed 5 May 2021.
10. Borderless. Available at: <https://www.borderless.net/wordpress/wp-content/uploads/2016/03/Survey-Results-Leadership-Development-2016.pdf>. Accessed 5 May 2021.
11. Training Magazine. Available at: <https://trainingmag.com/improving-leadership-development-the-time-to-act-is-now/>. Accessed: 5 May 2021.
12. Training Magazine. Available at: <https://trainingmag.com/the-702010-learning-framework-formalizing-the-informal/>. Accessed 5 May 2021.
13. AHRI. Available at: [https://www.ahri.com.au/wp-content/uploads/pulse\\_development-report.pdf](https://www.ahri.com.au/wp-content/uploads/pulse_development-report.pdf). Accessed 20 October 2022.
14. DeakinCo. Available online at: [https://deakinco.emdev.au/wp-content/uploads/2021/07/dc\\_70-20-10wp\\_v02\\_FA.pdf](https://deakinco.emdev.au/wp-content/uploads/2021/07/dc_70-20-10wp_v02_FA.pdf). Accessed 10 May 2022.
15. Branson Hall Group. Available at: [https://www.brandonhall.com/practice\\_area\\_le.php](https://www.brandonhall.com/practice_area_le.php). Accessed 10 November 2021
